# Supplementary material for: Inhibition of protein disulfide isomerase induces differentiation of acute myeloid leukemia cells
Source: PubMed Central journal article supplement — Haematologica. 2018 Jul 12;103(11):1843–52. doi: 10.3324/haematol.2018.190231 (PMC6278960; doi:10.3324/haematol.2018.190231), 2018-11
Supplement: 2018_190231-Disclosures_and_Contributions.pdf [file 2018_190231-Disclosures_and_Contributions.pdf]

Haematologica  
HAEMATOL/2018/190231  
Version 3

Inhibition of protein disulfide isomerase induces differentiation of acute myeloid leukemia cells

Justyna Chlebowska-Tuz, Olga Sokolowska, Pawel Gaj, Michal Lazniewski, Malgorzata Firczuk, Karolina Borowiec, Hanna Sas-Nowosielska, Malgorzata Bajor, Agata Malinowska, Angelika Muchowicz, Kavita Ramji, Piotr Stawinski, Mateusz Sobczak, Zofia Pilch, Anna Rodziewicz-Lurzynska, Malgorzata Zajac, Krzysztof Giannopoulos, Przemyslaw Juszczynski, Grzegorz W Basak, Dariusz Plewczynski, Rafal Ploski, Jakub Golab, and Dominika Nowis

Disclosures: This work was supported by Polish National Science Centre, grant numbers: 2013/10/E/NZ5/00778 (DN), 2014/15/B/ST6/05082 (DP), Foundation for Polish Science (TEAM to DP), Ministry of Science and Higher Education, grant number: IP2011 038971 (DN) and European Commission Horizon 2020 Programme 692180-STREAMH2020-TWINN-2015 (JG).

Contributions: JCh-T and OS performed most of the in vitro work with the help of KB, ZP, KR and MS; PG, PS and RP analyzed RNAseq data; ML and DP performed molecular dynamics and covalent docking of SK053 to human PDI and required bioinformatics analysis; MF, MB, AMal and AMuch assessed SK053 binding to recombinant human PDI; AR-L, MZ, KG, PJ and GWB were responsible for experiments in primary AML blasts; HS-N did fluorescence lifetime measurements; DN and JG conceived the study, coordinated the whole project and wrote the manuscript with the minor help of all authors. All authors accepted the final version of the manuscript.
